# Supplementary material
Source: publisher figshare collection journal article supplement (https://sage.figshare.com/ndownloader/files/19965668)
Supplement: Supplementary file 1 [file 19965668]

**Table S1.** Synthesize of the coding frame organised by specific themes and subthemes

|                                          |                                                                                    |
|------------------------------------------|------------------------------------------------------------------------------------|
| <b>Household environment themes</b>      |                                                                                    |
| <u>Theme 1</u>                           | <u>Instability</u>                                                                 |
| Subtheme 1                               | Material difficulties                                                              |
| Subtheme 2                               | Absence of parents                                                                 |
| <u>Theme 2</u>                           | <u>Gender conflicts</u>                                                            |
| Subtheme 1                               | Inequalities                                                                       |
| Subtheme 2                               | Independence from men                                                              |
| Subtheme 3                               | Tense gender relationships                                                         |
| <u>Theme 3</u>                           | <u>Intergenerational conflicts</u>                                                 |
| Subtheme 1                               | Lack of communication                                                              |
| Subtheme 2                               | Taboo of sexuality                                                                 |
| <u>Theme 4</u>                           | <u>Home pressure</u>                                                               |
| Subtheme 1                               | The duty of success                                                                |
| Subtheme 2                               | Success through children                                                           |
| Subtheme 3                               | The duty of independence                                                           |
| <b>Young women's mental health theme</b> |                                                                                    |
| <u>Theme 5</u>                           | <u>Daughters' emotional wellbeing</u>                                              |
| Subtheme 1                               | Psychological disturbances                                                         |
| Subtheme 2                               | Psychological disturbance determinants: conflicts, loneliness, over-responsibility |
